# Supplementary material for: Classic Galactosemia: Clinical and Computational Characterization of a Novel GALT Missense Variant (p.A303D) and a Literature Review
Source: MDPI journal article supplement (doi:10.3390/ijms242417388), 2023-12-12
Supplement: s1 [file s1]

**Supplementary Table S1.** Clinical summary of homozygous and compound heterozygous patients harboring the *GALT* c.855G>T (p.K285N) gene variant

| ID | Sex | Age at diagnosis (days) | Age at last follow-up (years) | Allele 1 | Allele 2 | Galactosemia subtype | Hepato-cellular damage | Other clinical manifestations                                                                  | Reference                            |
|----|-----|-------------------------|-------------------------------|----------|----------|----------------------|------------------------|------------------------------------------------------------------------------------------------|--------------------------------------|
| 1  | F   |                         | 16                            | R51L     | K285N    | Classic              |                        | Ovarian dysfunction, learning difficulties                                                     | Boutron et al <sup>34</sup>          |
| 2  | M   |                         | 22                            | H114P    | K285N    |                      |                        | Learning difficulties, lack of professional training                                           | Boutron et al <sup>34</sup>          |
| 3  | -   | 135                     | 4                             | S135L    | K285N    | Classic              | Yes                    | Hyperbilirubinemia, cataracts                                                                  | Garcia et al <sup>35</sup>           |
| 4  | M   |                         | 4                             | Q169K    | K285N    | Classic              |                        | Neonatal exchange transfusion                                                                  | Milánkovics et al <sup>42</sup>      |
| 5  | M   |                         | 35                            | H186Y    | K285N    | Clinical variant     |                        |                                                                                                | Boutron et al <sup>34</sup>          |
| 6  | -   |                         |                               | Q188R    | K285N    | Classic              |                        | Poor intellectual outcome                                                                      | Welsink-Karssies et al <sup>43</sup> |
| 7  | -   |                         |                               | Q188R    | K285N    | Classic              |                        | Movement disorder                                                                              | Welsink-Karssies et al <sup>43</sup> |
| 8  | -   |                         |                               | Q188R    | K285N    | Classic              |                        | Movement disorder, poor intellectual outcome                                                   | Welsink-Karssies et al <sup>43</sup> |
| 9  | F   | 8                       | 6.5                           | Q188R    | K285N    |                      | No                     | Speech delay, coagulopathy, hyperbilirubinemia                                                 | Ramadža et al <sup>37</sup>          |
| 10 | F   | 22                      | 14                            | Q188R    | K285N    |                      | Yes                    | Learning difficulties, coagulopathy, cataracts                                                 | Ramadža et al <sup>37</sup>          |
| 11 | M   | 26                      | 16.5                          | Q188R    | K285N    |                      | Yes                    | Behavioral problems, learning difficulties, residual cataract                                  | Ramadža et al <sup>37</sup>          |
| 12 | M   | 150                     | 22                            | Q188R    | K285N    |                      | Yes                    | Cataract, coagulopathy, failure to thrive, hyperbilirubinemia, sepsis                          | Ramadža et al <sup>37</sup>          |
| 13 | M   |                         | 20                            | Q188R    | K285N    | Classic              | Yes                    | Apraxia of speech, cataracts, sepsis                                                           | Viggiano et al <sup>36</sup>         |
| 14 | M   |                         | 3                             | Q188R    | K285N    | Classic              | Yes                    | White matter anomalies                                                                         | Viggiano et al <sup>36</sup>         |
| 15 | M   | 11680 (32 years)        | 34                            | Q188R    | K285N    | Classic              | No                     | Moderate cerebellar atrophy, global developmental delay, sensorineural hearing loss and myopia | Lucas-Del-Pozo et al <sup>44</sup>   |
| 16 | M   |                         | 8                             | Q188R    | K285N    | Classic              | No                     | Hyperbilirubinemia                                                                             | Yuzyuk et al <sup>45</sup>           |
| 17 | M   |                         | 12                            | Q188R    | K285N    | Classic              | Yes                    | Speech delay, developmental delay, sepsis                                                      | Yuzyuk et al <sup>45</sup>           |
| 18 | F   |                         |                               | Q188R    | K285N    |                      | No                     | Hyperbilirubinemia, cataract, sepsis                                                           | Schulpis et al <sup>46</sup>         |
| 19 | M   |                         |                               | Q188R    | K285N    |                      | No                     | Hyperbilirubinemia                                                                             | Schulpis et al <sup>46</sup>         |
| 20 | -   | 30                      | 0.17 (2 months)               | Q188R    | K285N    | Classic              | Yes                    | Hyperbilirubinemia, cataract                                                                   | Garcia et al <sup>35</sup>           |
| 21 | M   | 180                     | 33                            | Q188R    | K285N    |                      |                        | Intellectual disability                                                                        | Gubbels et al <sup>47</sup>          |

|    |   |    |    |       |       |                  |     |                                                                                       |                                 |
|----|---|----|----|-------|-------|------------------|-----|---------------------------------------------------------------------------------------|---------------------------------|
| 22 | M | 7  | 29 | Q188R | K285N |                  |     | Movement disorder                                                                     | Gubbels et al <sup>47</sup>     |
| 23 | F | 15 | 36 | Q188R | K285N |                  |     | Ovarian dysfunction                                                                   | Gubbels et al <sup>48</sup>     |
| 24 | M |    | 29 | Q188R | K285N |                  |     | Intellectual disability, anxiety, dysarthria                                          | Waisbren et al <sup>49</sup>    |
| 25 | M |    | 33 | Q188R | K285N |                  |     | Depression, anxiety, tremor                                                           | Waisbren et al <sup>49</sup>    |
| 26 | F |    | 36 | Q188R | K285N |                  |     | Depression, anxiety                                                                   | Waisbren et al <sup>49</sup>    |
| 27 | F |    | 21 | Q188R | K285N | Classic          |     | Speech problem, hypergonadotropic hypogonadism, movement disorder                     | Milánkovics et al <sup>42</sup> |
| 28 | M |    | 21 | Q188R | K285N | Classic          |     | Speech problem, neonatal exchange transfusion, movement disorder                      | Milánkovics et al <sup>42</sup> |
| 29 | F |    | 18 | Q188R | K285N | Classic          |     | Speech problem, movement disorder                                                     | Milánkovics et al <sup>42</sup> |
| 30 | F |    | 16 | Q188R | K285N | Classic          |     | Speech problem, movement disorder, cataracts                                          | Milánkovics et al <sup>42</sup> |
| 31 | M |    | 14 | Q188R | K285N | Classic          |     | Speech problem, neonatal exchange transfusion                                         | Milánkovics et al <sup>42</sup> |
| 32 | M |    | 13 | Q188R | K285N | Classic          |     | Prenatal diet, speech problem, movement disorder                                      | Milánkovics et al <sup>42</sup> |
| 33 | F |    | 5  | Q188R | K285N | Classic          |     | Speech problem                                                                        | Milánkovics et al <sup>42</sup> |
| 34 | F |    | 5  | Q188R | K285N | Classic          |     | Speech problem, streak gonad, movement disorder                                       | Milánkovics et al <sup>42</sup> |
| 35 | F |    | -  | Q188R | K285N | Classic          |     | Neonatal exchange transfusion                                                         | Milánkovics et al <sup>42</sup> |
| 36 | F |    | -  | Q188R | K285N | Classic          |     | Neonatal exchange transfusion                                                         | Milánkovics et al <sup>42</sup> |
| 37 | M |    | 21 | L195P | K285N |                  |     |                                                                                       | Gubbels et al <sup>47</sup>     |
| 38 | F |    |    | L195P | K285N | Classic          | Yes | Coagulopathy, failure to thrive, hypoglycemia, movement disorder                      | Asteggiano et al <sup>50</sup>  |
| 39 | F |    | 21 | Y209S | K285N | Classic          |     | Ovarian dysfunction                                                                   | Boutron et al <sup>34</sup>     |
| 40 | - |    |    | Y209S | K285N | Classic          |     | Severe hypoglycemia in the neonatal period; mental development: retarded              | Zekanowski et al <sup>51</sup>  |
| 41 | M |    | 37 | R231H | K285N | Classic          |     | Delayed milestones, learning difficulties, intellectual disability, movement disorder | Boutron et al <sup>34</sup>     |
| 42 | F |    | 17 | R231H | K285N | Clinical variant |     |                                                                                       | Boutron et al <sup>34</sup>     |
| 43 | F |    | 8  | R231H | K285N | Clinical variant |     |                                                                                       | Boutron et al <sup>34</sup>     |
| 44 | F |    | 24 | P244S | K285N | Classic          | Yes | Apraxia of speech, cataract, white matter anomalies, sepsis                           | Viggiano et al <sup>36</sup>    |
| 45 | M | 21 | 14 | E271D | K285N |                  | No  | Behavioral problems, speech delay,                                                    | Ramadža et al <sup>37</sup>     |

|    |   |    |     |             |       |         |     |                                                                                      |                                |
|----|---|----|-----|-------------|-------|---------|-----|--------------------------------------------------------------------------------------|--------------------------------|
|    |   |    |     |             |       |         |     | learning difficulties, hyperbilirubinemia, cataracts, sepsis                         |                                |
| 46 | M |    | 6   | E271D       | K285N | Classic | Yes | Cataracts                                                                            | Viggiano et al <sup>36</sup>   |
| 47 | M | 10 | 4.5 | K285N       | K285N |         | Yes | Hyperbilirubinemia                                                                   | Ramadža et al <sup>37</sup>    |
| 48 | F | 8  | 13  | K285N       | K285N |         | No  | Learning difficulties, severe osteopenia, cataract                                   | Ramadža et al <sup>37</sup>    |
| 49 | F |    | 4   | K285N       | K285N | Classic | Yes |                                                                                      | Viggiano et al <sup>36</sup>   |
| 50 | F |    |     | A320T       | K285N |         | No  | Hyperbilirubinemia                                                                   | Schulpis et al <sup>46</sup>   |
| 51 | - |    |     | A320T       | K285N | Classic |     |                                                                                      | Zekanowski et al <sup>51</sup> |
| 52 | M |    | 26  | P325L       | K285N | Classic |     | Learning difficulties, delayed milestones, low-skilled profession, movement disorder | Boutron et al <sup>34</sup>    |
| 53 | M |    | 39  | R333L       | K285N | Classic |     | Low-skilled profession, learning difficulties, speech delay                          | Boutron et al <sup>34</sup>    |
| 54 | M |    | 14  | Y339C–N314D | K285N | Classic |     | Learning difficulties, speech delay                                                  | Boutron et al <sup>34</sup>    |
